# Supplementary material
Source: PubMed Central journal article supplement (PMC6688492)
Supplement: NIHMS1033075-supplement-SUPP.pdf [file NIHMS1033075-supplement-SUPP.pdf]

**Supplement 1:****Parameters for NOESYPR1D experiments (1Dimensional <sup>1</sup>H NMR spectra with solvent suppression)**

|                             |                |                            |                 |
|-----------------------------|----------------|----------------------------|-----------------|
| F2 - Acquisition Parameters |                | ----- CHANNEL f1 -----     |                 |
| PROBHD                      | 5 mm FI        | NUC1                       | <sup>1</sup> H  |
| PULPROG                     | noesypr1d      | P1                         | 7.75 μsec       |
| TD                          | 32768          | PL1                        | 1.00 dB         |
| SOLVENT                     | D2O            | PL9                        | 55.00 dB        |
| NS                          | 64             | SFO1                       | 600.2928245 MHz |
| DS                          | 8              | F2 - Processing parameters |                 |
| SWH                         | 12019.23 Hz    | SI                         | 65536           |
| FIDRES                      | 0.366798 Hz    | SF                         | 600.2199568 MHz |
| AQ                          | 1.3631988 sec  | WDW                        | no              |
| RG                          | 228.1          | SSB                        | 0               |
| DW                          | 83.2 μsec      | LB                         | 0.3 Hz          |
| DE                          | 7.00 μsec      | GB                         | 0.0             |
| TE                          | 300.0 K        | PC                         | 1.00            |
| D1                          | 2.00000000 sec |                            |                 |
| D8                          | 0.10000000 sec |                            |                 |
| D11                         | 0.03000000 sec |                            |                 |
| d12                         | 0.00002000 sec |                            |                 |
| MCREST                      | 0.00000000 sec |                            |                 |
| MCWRK                       | 0.01500000 sec |                            |                 |

## Parameters for TOCSY experiments

|                             |                            |                             |                   |
|-----------------------------|----------------------------|-----------------------------|-------------------|
| F2 - Acquisition Parameters |                            | ===== CHANNEL f1 =====      |                   |
| PROBHD                      | 5 mm TXI <sup>1</sup> H-13 | NUC1                        | <sup>1</sup> H    |
| PULPROG                     | mlevphpr                   | P1                          | 10.65 $\mu$ sec   |
| TD                          | 2048                       | p5                          | 26.68 $\mu$ sec   |
| SOLVENT                     | D <sub>2</sub> O           | P6                          | 40.00 $\mu$ sec   |
| NS                          | 56                         | p7                          | 80.00 $\mu$ sec   |
| DS                          | 8                          | P17                         | 2500.00 $\mu$ sec |
| SWH                         | 6313.131 Hz                | PL1                         | 0.00 dB           |
| FIDRES                      | 3.082584 Hz                | PL9                         | 54.00 dB          |
| AQ                          | 0.1622516 sec              | PL10                        | 12.00 dB          |
| RG                          | 228.1                      | SFO1                        | 600.2928250 MHz   |
| DW                          | 79.200 $\mu$ sec           | F1 - Acquisition parameters |                   |
| DE                          | 6.50 $\mu$ sec             | ND0                         | 1                 |
| TE                          | 300.0 K                    | TD                          | 120               |
| d0                          | 0.00006855 sec             | SFO1                        | 600.2928 MHz      |
| D1                          | 1.20000005 sec             | FIDRES                      | 52.526527 Hz      |
| D9                          | 0.09500000 sec             | SW                          | 10.500 ppm        |
| d11                         | 0.03000000 sec             | FnMODE                      | TPPI              |
| d12                         | 0.00002000 sec             | F2 - Processing parameters  |                   |
| d13                         | 0.00000400 sec             | SI                          | 2048              |
| FACTOR1                     | 6                          | SF                          | 600.2899643 MHz   |
| IN0                         | 0.00015865 sec             | WDW                         | SINE              |
| II                          | 36                         | SSB                         | 2                 |
| MCREST                      | 0.00000000 sec             | LB                          | 0.00 Hz           |
| MCWRK                       | 0.01500000 sec             | GB                          | 0                 |
| SCALEF                      | 6                          | PC                          | 1.00              |
|                             |                            | F1 - Processing parameters  |                   |
|                             |                            | SI                          | 2048              |
|                             |                            | MC2                         | TPPI              |
|                             |                            | SF                          | 600.2899657 MHz   |
|                             |                            | WDW                         | SINE              |
|                             |                            | SSB                         | 2                 |
|                             |                            | LB                          | 0.00 Hz           |
|                             |                            | GB                          | 0                 |

## Parameters for HSQC experiments

|                             |                  |                              |                 |
|-----------------------------|------------------|------------------------------|-----------------|
| F2 - Acquisition Parameters |                  | ----- GRADIENT CHANNEL ----- |                 |
| PROBHD                      | 5 mm TX1 H-13    | GPNAM1                       | SINE.100        |
| PULPROG                     | hsqcetgppr       | GPNAM2                       | SINE.100        |
| TD                          | 2048             | GPX1                         | 0.00 %          |
| SOLVENT                     | D <sub>2</sub> O | GPX2                         | 0.00 %          |
| NS                          | 280              | GPY1                         | 0.00 %          |
| DS                          | 16               | GPY2                         | 0.00 %          |
| SWH                         | 6313.131 Hz      | GPZ1                         | 80.00 %         |
| FIDRES                      | 3.082584 Hz      | GPZ2                         | 20.10 %         |
| AQ                          | 0.1622516 sec    | P16                          | 1500.00 usec    |
| RG                          | 5792.6           |                              |                 |
| DW                          | 79.200 μsec      | F1 - Acquisition parameters  |                 |
| DE                          | 7.00 μsec        | ND0                          | 2               |
| TE                          | 300.0 K          | TD                           | 100             |
| CNST2                       | 145.0000000      | SFO1                         | 150.9573 MHz    |
| d0                          | 0.00000300 sec   | FIDRES                       | 301.886780 Hz   |
| D1                          | 1.20000005 sec   | SW                           | 199.982 ppm     |
| d4                          | 0.00172414 sec   | FnMODE                       | Echo-Antiecho   |
| d11                         | 0.03000000 sec   |                              |                 |
| d13                         | 0.00000400 sec   | F2 - Processing parameters   |                 |
| D16                         | 0.00020000 sec   | SI                           | 2048            |
| DELTA                       | 0.00172730 sec   | SF                           | 600.2899613 MHz |
| DELTA1                      | 0.00021614 sec   | WDW                          | QSINE           |
| IN0                         | 0.00001656 sec   | SSB                          | 2               |
| MCREST                      | 0.00000000 sec   | LB                           | 0.00 Hz         |
| MCWRK                       | 0.00600000 sec   | GB                           | 0               |
| STICNT                      | 50               | PC                           | 1.40            |
|                             |                  |                              |                 |
|                             |                  | F1 - Processing parameters   |                 |
| ----- CHANNEL f1 -----      |                  | SI                           | 2048            |
| NUC1                        | <sup>1</sup> H   | MC2                          | echo-antiecho   |
| P1                          | 10.65 μsec       | SF                           | 150.9430146 MHz |
| p2                          | 21.30 μsec       | WDW                          | QSINE           |
| P28                         | 1.00 μsec        | SSB                          | 2               |
| PL1                         | 0.00 dB          | LB                           | 0.00 Hz         |
| PL9                         | 54.00 dB         | GB                           | 0               |
| SFO1                        | 600.2928250 MHz  |                              |                 |
|                             |                  |                              |                 |
| ----- CHANNEL f2 -----      |                  |                              |                 |
| CPDPRG2                     | garp             |                              |                 |
| NUC2                        | <sup>13</sup> C  |                              |                 |
| P3                          | 13.20 μsec       |                              |                 |
| p4                          | 26.40 μsec       |                              |                 |
| PCPD2                       | 65.00 μsec       |                              |                 |
| PL2                         | 0.00 dB          |                              |                 |
| PL12                        | 13.80 dB         |                              |                 |
| SFO2                        | 150.9573206 MHz  |                              |                 |



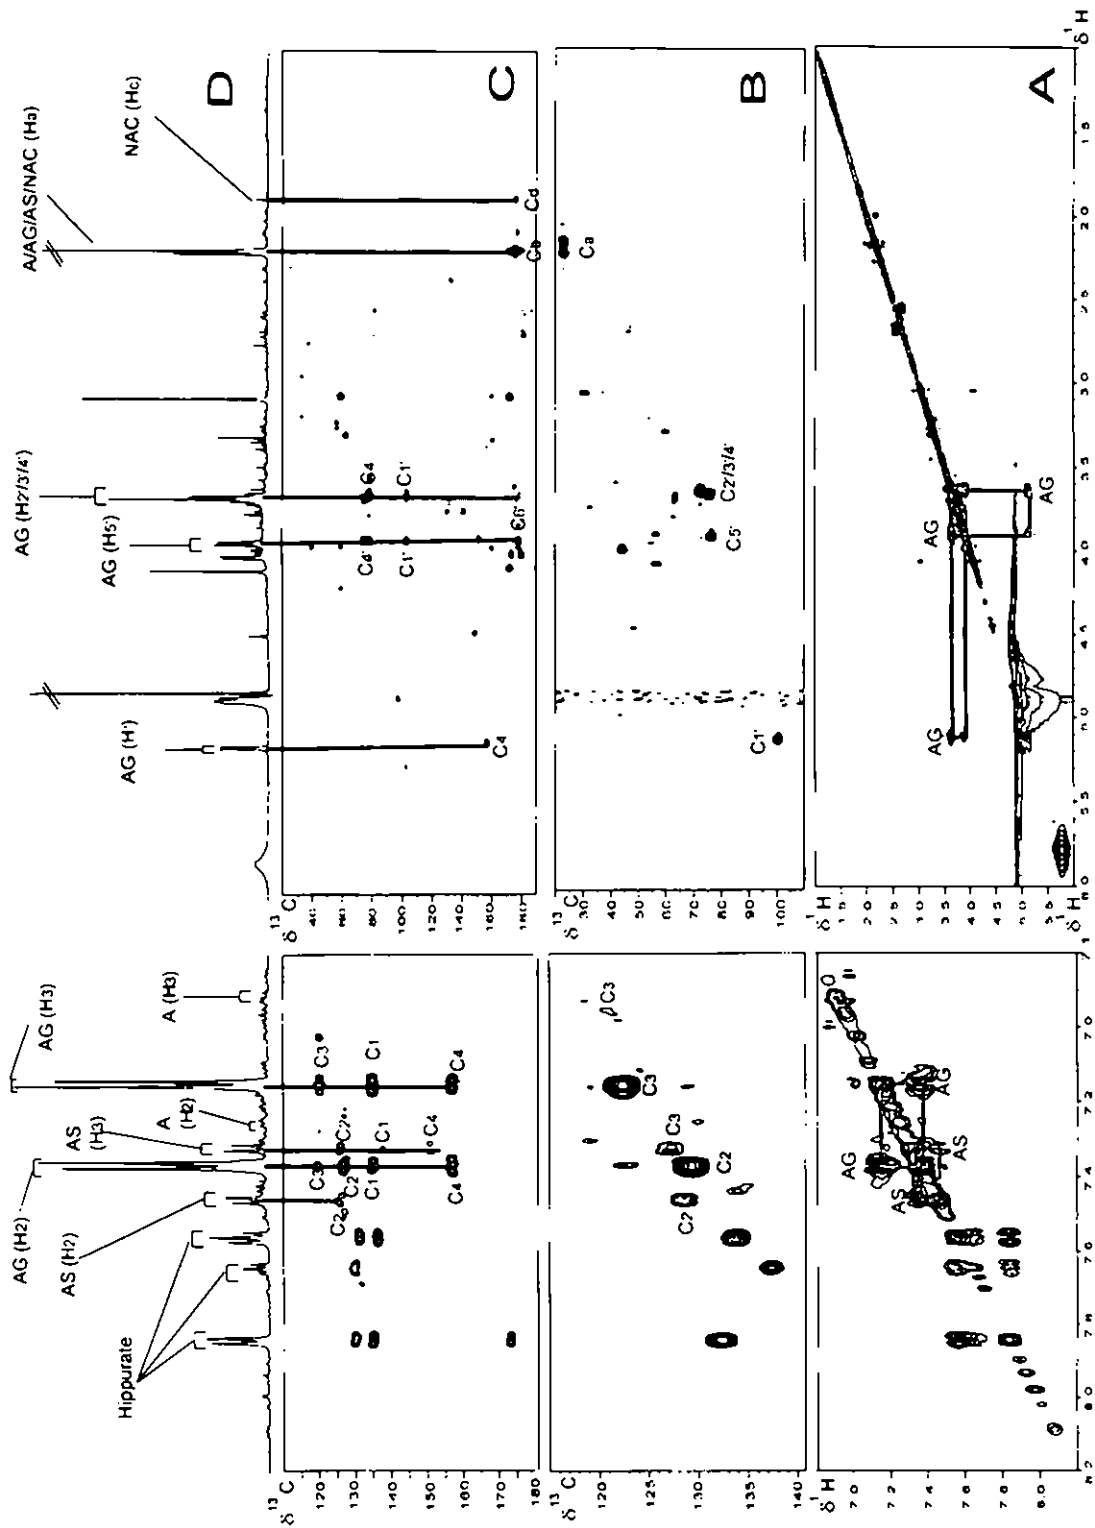

*The mean and median correlation coefficient (together with 95% confidence interval) for the major acetaminophen metabolites as 1D STOCYSY 'driver' peaks (δ)*

|     | N-acetyl-cysteine (NAC)<br>δ 1.86 | Acetaminophen (A)<br>δ 7.25 | Acetaminophen glucuronide (AG)<br>δ 2.17 | Acetaminophen sulfate (AS)<br>δ 7.46 |
|-----|-----------------------------------|-----------------------------|------------------------------------------|--------------------------------------|
| NAC | 1.86                              | 1, 1                        | 0.61, 0.60<br>(0.50 - 0.72)              | 0.68, 0.68<br>(0.57 - 0.78)          |
|     | 2.15                              | 0.80, 0.80<br>(0.72 - 0.85) | 0.84, 0.84<br>(0.71 - 0.92)              | 0.88, 0.88<br>(0.84 - 0.91)          |
|     | 6.96                              | 0.77, 0.77<br>(0.71 - 0.82) | 0.73, 0.74<br>(0.60 - 0.83)              | 0.70, 0.70<br>(0.59 - 0.78)          |
| A   | 2.16                              | 0.76, 0.76<br>(0.62 - 0.88) | 0.83, 0.83<br>(0.71 - 0.90)              | 0.88, 0.88<br>(0.83 - 0.92)          |
|     | 6.91                              | 0.69, 0.70<br>(0.63 - 0.76) | 0.79, 0.80<br>(0.66 - 0.89)              | 0.76, 0.76<br>(0.69 - 0.84)          |
|     | 7.25                              | 0.74, 0.74<br>(0.62 - 0.84) | 1, 1                                     | 0.85, 0.85<br>(0.78 - 0.9)           |
| AG  | 2.17                              | 0.61, 0.60<br>(0.50 - 0.72) | 1, 1                                     | 0.88, 0.88<br>(0.84 - 0.92)          |
|     | 3.62                              | 0.77, 0.77<br>(0.71 - 0.83) | 0.79, 0.79<br>(0.67 - 0.88)              | 0.83, 0.83<br>(0.79 - 0.86)          |
|     | 3.89                              | 0.57, 0.57<br>(0.49 - 0.65) | 0.69, 0.70<br>(0.59 - 0.79)              | 0.72, 0.72<br>(0.61 - 0.82)          |
| AS  | 5.1                               | 0.70, 0.70<br>(0.61 - 0.78) | 0.80, 0.80<br>(0.68 - 0.88)              | 0.87, 0.87<br>(0.81 - 0.91)          |
|     | 7.13                              | 0.69, 0.69<br>(0.61 - 0.77) | 0.75, 0.75<br>(0.64 - 0.83)              | 0.80, 0.80<br>(0.75 - 0.85)          |
|     | 7.36                              | 0.72, 0.72<br>(0.64 - 0.79) | 0.82, 0.83<br>(0.70 - 0.90)              | 0.89, 0.89<br>(0.84 - 0.92)          |
| AS  | 2.18                              | 0.73, 0.73<br>(0.64 - 0.81) | 0.81, 0.81<br>(0.74 - 0.87)              | 0.94, 0.94<br>(0.91 - 0.96)          |
|     | 7.31                              | 0.69, 0.69<br>(0.62 - 0.77) | 0.76, 0.76<br>(0.63 - 0.85)              | 0.90, 0.90<br>(0.86 - 0.93)          |
|     | 7.46                              | 0.68, 0.68<br>(0.57 - 0.78) | 0.85, 0.85<br>(0.78 - 0.90)              | 1, 1                                 |

Shaded columns indicate the intra-molecular correlation coefficient.
